# Supplementary material for: Detection of Viral Proteins in Human Cells Lines by Xeno-Proteomics: Elimination of the Last Valid Excuse for Not Testing Every Cellular Proteome Dataset for Viral Proteins
Source: PubMed Central journal article supplement (PMC3950186; doi:10.1371/journal.pone.0091433), 2014-03-11

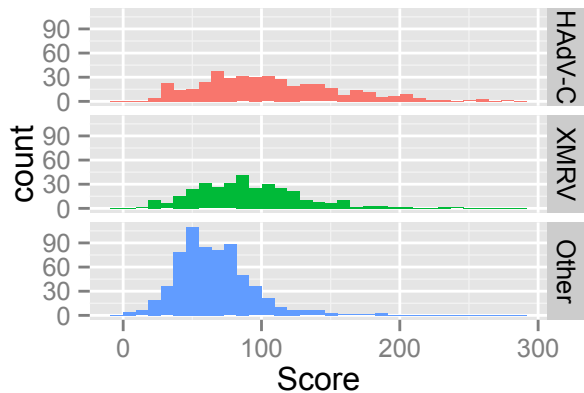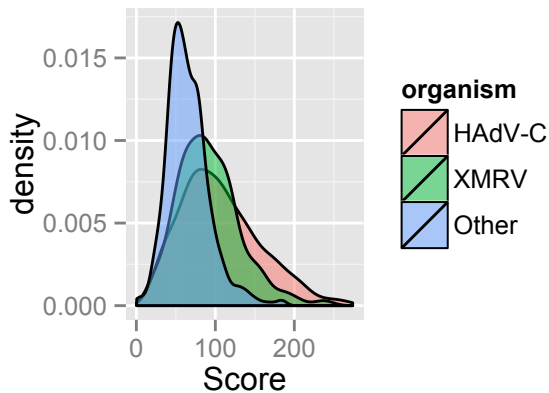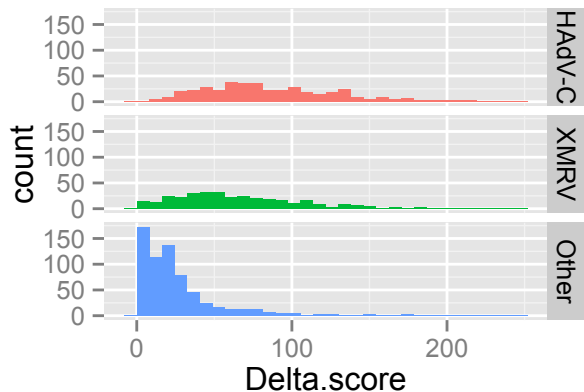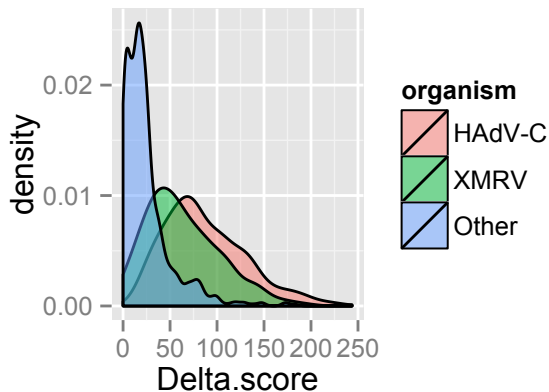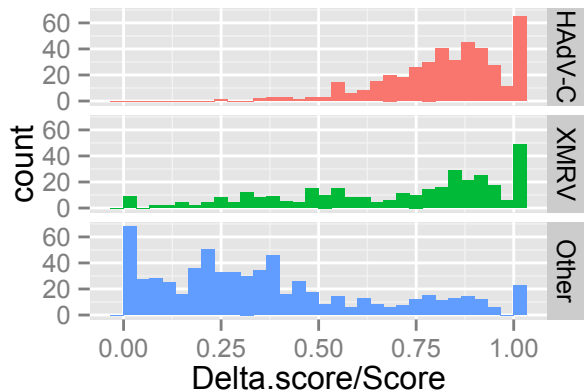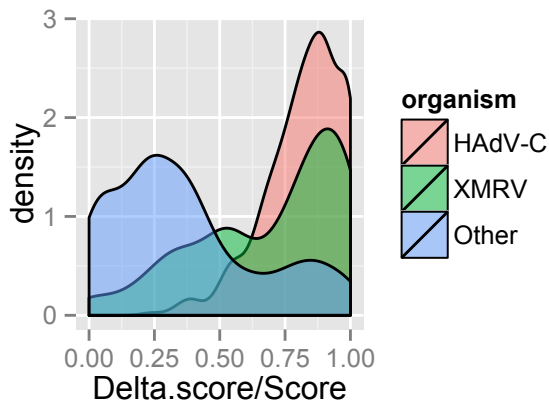

Supplement: pone.0091433.s001.pdf [file pone.0091433.s001.pdf]
